# Supplementary material for: Multi-omics reveals new links between Fructosamine-3-Kinase (FN3K) and core metabolic pathways
Source: NPJ Syst Biol Appl. 2024 Jun 3;10:64. doi: 10.1038/s41540-024-00390-0 (PMC11148063; doi:10.1038/s41540-024-00390-0)
Supplement: Supplementary file 3 — Supplementary Dataset File 1 [file 41540_2024_390_MOESM3_ESM.xlsx]

## Sheet: RNASeq
#mapped_geneID	gene_name	id	fc	pval	qval	de	minus_log10_pvalue
ENSG00000278952	RP11-399J13.2	MSTRG.4095	2.07182	0.00371016	0.0335975	1.0509	2.43061
ENSG00000278828	HIST1H3H	MSTRG.20609	2.41717	0.00289062	0.0296381	1.27332	2.53901
ENSG00000276019	HULC	MSTRG.20457	0.482447	0.00312198	0.0305574	-1.05156	2.50557
ENSG00000269893	SNHG8	MSTRG.18888	0.325229	0.00657798	0.0439394	-1.62047	2.18191
ENSG00000268439	RP3-461F17.3	MSTRG.4912	2.62938	0.00132541	0.0222428	1.39472	2.87765
ENSG00000267322	SNHG22	MSTRG.11916	0.243243	0.0378457	0.113913	-2.03953	1.42198
ENSG00000265972	TXNIP	MSTRG.1488	4.43048	0.00103869	0.0201111	2.14746	2.98351
ENSG00000261701	HPR	MSTRG.9655	2.08935	0.00811615	0.0477284	1.06305	2.09065
ENSG00000261012	RP11-116D2.1	MSTRG.13592	2.01447	0.0297294	0.0977197	1.0104	1.52681
ENSG00000260459	FTLP14	MSTRG.9565	2.17779	0.0045211	0.036847	1.12286	2.34476
ENSG00000257017	HP	MSTRG.9655	2.08935	0.00811615	0.0477284	1.06305	2.09065
ENSG00000255717	SNHG1	MSTRG.4042	0.275628	2.27885e-05	0.0119133	-1.85921	4.64228
ENSG00000255398	HCAR3	MSTRG.6082	2.72079	0.00589645	0.0417879	1.44403	2.22941
ENSG00000255071	SAA2-SAA4	MSTRG.3730	3.07683	0.000264521	0.0138373	1.62144	3.57754
ENSG00000246705	H2AFJ	MSTRG.5020	2.22425	0.000455804	0.016081	1.15332	3.34122
ENSG00000244509	APOBEC3C	MSTRG.16628	2.04839	0.00146813	0.0229877	1.03449	2.83324
ENSG00000244062	RP11-404G16.2	MSTRG.17775	2.86184	0.00518864	0.0392608	1.51694	2.28495
ENSG00000243955	GSTA1	MSTRG.21007	4.09589	0.00601331	0.0419204	2.03418	2.22089
ENSG00000243449	C4orf48	MSTRG.18297	2.70937	0.0337102	0.106017	1.43796	1.47224
ENSG00000239382	ALKBH6	MSTRG.12827	2.29863	0.00959548	0.0520021	1.20077	2.01793
ENSG00000237988	OR2I1P	MSTRG.20633	6.43841	0.000730832	0.0176328	2.6867	3.13618
ENSG00000236552	RPL13AP5	MSTRG.3168	0.44796	0.00545043	0.0404299	-1.15856	2.26357
ENSG00000235162	C12orf75	MSTRG.5833	2.1925	0.000755794	0.0176328	1.13257	3.1216
ENSG00000234741	GAS5	MSTRG.1938	0.237152	1.50027e-05	0.0119133	-2.07611	4.82383
ENSG00000233016	SNHG7	MSTRG.24669	0.435244	0.00798765	0.0474113	-1.2001	2.09758
ENSG00000232838	PET117	MSTRG.15390	2.1088	0.00767354	0.0464136	1.07642	2.115
ENSG00000229119	CTB-63M22.1	MSTRG.20218	0.457692	0.0033442	0.0317774	-1.12755	2.47571
ENSG00000228594	C1orf233	MSTRG.82	2.25183	0.000525916	0.0163085	1.1711	3.27908
ENSG00000226738	CTA-384D8.31	MSTRG.16803	0.0935158	0.00207817	0.0257691	-3.41865	2.68232
ENSG00000226479	TMEM185B	MSTRG.14427	0.480005	0.00210058	0.0257691	-1.05888	2.67766
ENSG00000225377	NRSN2-AS1	MSTRG.15253	0.347359	0.0151069	0.0666896	-1.5255	1.82082
ENSG00000224189	HAGLR	MSTRG.14721	0.35978	0.00134919	0.0224586	-1.47481	2.86993
ENSG00000215252	GOLGA8B	MSTRG.7653	0.327707	0.0337286	0.106017	-1.60952	1.472
ENSG00000214967	NPIPA7	MSTRG.8963	0.451612	0.0013693	0.0224586	-1.14684	2.8635
ENSG00000214456	PLIN5	MSTRG.12236	2.01718	0.00421614	0.0357064	1.01234	2.37508
ENSG00000213886	UBD	MSTRG.20636	4.46828	0.000132517	0.0122089	2.15972	3.87773
ENSG00000213759	UGT2B11	MSTRG.18633	5.63715	0.000258677	0.0137291	2.49497	3.58724
ENSG00000213648	SULT1A4	MSTRG.9162	2.95547	0.00808449	0.0477284	1.56339	2.09235
ENSG00000213442	RPL18AP3	MSTRG.5823	0.454355	0.00315564	0.0306719	-1.13811	2.50091
ENSG00000213145	CRIP1	MSTRG.7532	3.63363	0.00777242	0.0467448	1.86141	2.10944
ENSG00000212901	KRTAP3-1	MSTRG.10700	2.5163	0.0191298	0.0761002	1.3313	1.71829
ENSG00000211452	DIO1	MSTRG.935	2.61603	0.0004458	0.016081	1.38738	3.35086
ENSG00000211445	GPX3	MSTRG.20145	4.50494	0.00021384	0.0132592	2.17151	3.66991
ENSG00000210174	MT-TR	MSTRG.24822	2.09163	0.0283746	0.0947858	1.06463	1.54707
ENSG00000210049	MT-TF	MSTRG.24800	0.490521	0.000510778	0.016081	-1.02761	3.29177
ENSG00000205542	TMSB4X	MSTRG.24884	2.43993	0.0252387	0.0887801	1.28684	1.59793
ENSG00000205364	MT1M	MSTRG.9383	2.86356	0.00336887	0.031964	1.51781	2.47252
ENSG00000205362	MT1A	MSTRG.9388	3.13806	0.00283015	0.0295047	1.64987	2.54819
ENSG00000205116	TMEM88B	MSTRG.69	2.06107	0.00165672	0.0240162	1.04339	2.78075
ENSG00000204520	MICA	MSTRG.20718	2.14153	0.000106363	0.0119133	1.09865	3.97321
ENSG00000204516	MICB	MSTRG.20722	4.74433	0.0036269	0.0331744	2.2462	2.44046
ENSG00000204387	C6orf48	MSTRG.20748	0.493857	0.000796378	0.0182765	-1.01784	3.09888
ENSG00000204348	DXO	MSTRG.20771	0.36911	0.0404585	0.11838	-1.43788	1.39299
ENSG00000204120	GIGYF2	MSTRG.15134	0.253346	0.00574195	0.0412913	-1.98082	2.24094
ENSG00000203985	LDLRAD1	MSTRG.938	0.476025	0.0405268	0.11838	-1.07089	1.39226
ENSG00000198835	GJC2	MSTRG.2318	0.478124	0.0262236	0.0907478	-1.06454	1.58131
ENSG00000198805	PNP	MSTRG.6687	2.14482	0.000435475	0.0160451	1.10086	3.36104
ENSG00000198792	TMEM184B	MSTRG.16612	2.2045	0.00165851	0.0240162	1.14045	2.78028
ENSG00000198756	COLGALT2	MSTRG.2016	0.352766	0.000252684	0.0137291	-1.50321	3.59742
ENSG00000198546	ZNF511	MSTRG.3465	2.34269	0.00217202	0.0260519	1.22816	2.66314
ENSG00000198417	MT1F	MSTRG.9391	6.71348	0.000555098	0.0166254	2.74706	3.25563
ENSG00000198203	SULT1C2	MSTRG.14319	2.05704	0.00145697	0.0229877	1.04057	2.83655
ENSG00000198074	AKR1B10	MSTRG.22676	2.6704	0.00174209	0.0244469	1.41706	2.75893
ENSG00000197989	SNHG12	MSTRG.543	0.45431	0.0130437	0.060963	-1.13825	1.8846
ENSG00000197956	S100A6	MSTRG.1662	5.06075	0.000874778	0.0189794	2.33935	3.0581
ENSG00000197747	S100A10	MSTRG.1657	2.93888	0.001985	0.0254136	1.55527	2.70224
ENSG00000197712	FAM114A1	MSTRG.18457	2.15045	0.00119658	0.021071	1.10464	2.92206
ENSG00000196950	SLC39A10	MSTRG.14847	0.496365	0.0200845	0.0781378	-1.01053	1.69714
ENSG00000196787	HIST1H2AG	MSTRG.20593	2.35842	0.000891348	0.0190622	1.23782	3.04995
ENSG00000196743	GM2A	MSTRG.20155	2.45539	0.0014715	0.0229877	1.29595	2.83224
ENSG00000196352	CD55	MSTRG.2174	0.44779	0.0252958	0.0888312	-1.1591	1.59695
ENSG00000189221	MAOA	MSTRG.25032	0.468083	0.0321678	0.103201	-1.09516	1.49258
ENSG00000189143	CLDN4	MSTRG.22161	2.9786	0.00228223	0.0267176	1.57464	2.64164
ENSG00000189077	TMEM120A	MSTRG.22213	0.482933	0.000312414	0.0143914	-1.0501	3.50527
ENSG00000188582	PAQR9	MSTRG.17862	2.82817	0.000742578	0.0176328	1.49987	3.12926
ENSG00000187735	TCEA1	MSTRG.23253	0.483739	0.00106217	0.0202585	-1.0477	2.97381
ENSG00000187630	DHRS4L2	MSTRG.6793	2.71411	0.00120671	0.0210743	1.44048	2.9184
ENSG00000187601	MAGEH1	MSTRG.25159	2.28885	0.0145574	0.0653081	1.19463	1.83692
ENSG00000187288	CIDEC	MSTRG.16863	6.41276	0.00101627	0.0201111	2.68094	2.99299
ENSG00000187193	MT1X	MSTRG.9395	4.51066	0.00282677	0.0295047	2.17334	2.54871
ENSG00000187109	NAP1L1	MSTRG.5650	0.480106	0.00150268	0.0230737	-1.05857	2.82313
ENSG00000186115	CYP4F2	MSTRG.12565	2.70411	0.00408575	0.0352322	1.43515	2.38873
ENSG00000185615	PDIA2	MSTRG.8566	0.338156	0.00162405	0.0238984	-1.56424	2.7894
ENSG00000185559	DLK1	MSTRG.7449	6.27895	0.000142927	0.012797	2.65052	3.84489
ENSG00000185432	METTL7A	MSTRG.5334	2.04416	0.000589277	0.0166254	1.03151	3.22968
ENSG00000185222	WBP5	MSTRG.25320	4.47996	0.00119393	0.021071	2.16349	2.92302
ENSG00000184697	CLDN6	MSTRG.8738	2.52051	0.00678424	0.0445071	1.33372	2.1685
ENSG00000184502	GAST	MSTRG.10709	4.38973	0.00862948	0.0492267	2.13413	2.06402
ENSG00000184227	ACOT1	MSTRG.7233	2.55323	0.00145191	0.0229877	1.35232	2.83806
ENSG00000183844	FAM3B	MSTRG.16116	2.56236	0.0423841	0.121573	1.35747	1.3728
ENSG00000182600	C2orf82	MSTRG.15134	0.253346	0.00574195	0.0412913	-1.98082	2.24094
ENSG00000182326	C1S	MSTRG.4912	2.62938	0.00132541	0.0222428	1.39472	2.87765
ENSG00000182162	P2RY8	MSTRG.24843	2.2709	0.00522643	0.0393654	1.18326	2.2818
ENSG00000181396	OGFOD3	MSTRG.11535	2.1602	0.0378942	0.113959	1.11116	1.42143
ENSG00000181392	SYNE4	MSTRG.12827	2.29863	0.00959548	0.0520021	1.20077	2.01793
ENSG00000180964	TCEAL8	MSTRG.25318	2.26197	0.00554135	0.0406771	1.17758	2.25638
ENSG00000180035	ZNF48	MSTRG.9214	0.48154	0.000309985	0.0143914	-1.05427	3.50866
ENSG00000179241	LDLRAD3	MSTRG.3841	0.33889	0.00267473	0.0290158	-1.56111	2.57272
ENSG00000179222	MAGED1	MSTRG.25131	2.33441	0.000158191	0.0128425	1.22306	3.80082
ENSG00000178234	GALNT11	MSTRG.22837	2.16264	0.00152868	0.0231929	1.11279	2.81568
ENSG00000177606	JUN	MSTRG.971	2.47325	0.00338858	0.0320554	1.30641	2.46998
ENSG00000177508	IRX3	MSTRG.9363	0.483277	0.00222079	0.0262916	-1.04908	2.65349
ENSG00000177410	ZFAS1	MSTRG.15732	0.24665	4.34272e-05	0.0119133	-2.01946	4.36224
ENSG00000176919	C8G	MSTRG.24690	3.03297	0.00306879	0.0304817	1.60073	2.51303
ENSG00000175854	SWI5	MSTRG.24526	2.11644	0.0232525	0.0847607	1.08164	1.63353
ENSG00000175745	NR2F1	MSTRG.19672	0.456693	0.0111459	0.055991	-1.1307	1.95289
ENSG00000175336	APOF	MSTRG.5461	2.4243	0.00383779	0.0342171	1.27757	2.41592
ENSG00000175063	UBE2C	MSTRG.15683	0.448791	0.00682683	0.0446483	-1.15588	2.16578
ENSG00000175061	LRRC75A-AS1	MSTRG.10265	0.447639	0.000723235	0.0176328	-1.15959	3.14072
ENSG00000174327	SLC16A13	MSTRG.10098	3.84565	8.71224e-05	0.0119133	1.94323	4.05987
ENSG00000173930	SLCO4C1	MSTRG.19724	2.62917	0.000127255	0.0122089	1.39461	3.89533
ENSG00000173762	CD7	MSTRG.11531	2.27281	0.00255587	0.0284547	1.18448	2.59246
ENSG00000172893	DHCR7	MSTRG.4265	6.23613	9.93441e-05	0.0119133	2.64065	4.00286
ENSG00000172432	GTPBP2	MSTRG.20963	0.45762	0.00842335	0.0485384	-1.12778	2.07452
ENSG00000172339	ALG14	MSTRG.1233	0.305039	0.0158046	0.0682541	-1.71294	1.80122
ENSG00000172059	KLF11	MSTRG.13528	2.30314	0.00174757	0.0244661	1.2036	2.75757
ENSG00000171848	RRM2	MSTRG.13530	2.40058	0.00293481	0.0297162	1.26338	2.53242
ENSG00000171345	KRT19	MSTRG.10707	3.90484	9.68503e-05	0.0119133	1.96527	4.0139
ENSG00000171236	LRG1	MSTRG.12236	2.01718	0.00421614	0.0357064	1.01234	2.37508
ENSG00000171223	JUNB	MSTRG.12483	2.08286	0.0112499	0.0562674	1.05856	1.94885
ENSG00000170909	OSCAR	MSTRG.13305	0.462738	0.0423986	0.121573	-1.11173	1.37265
ENSG00000170522	ELOVL6	MSTRG.18863	3.11477	0.00193678	0.0254136	1.63912	2.71292
ENSG00000170473	PYM1	MSTRG.5439	2.38328	0.00191147	0.0254136	1.25295	2.71863
ENSG00000170458	CD14	MSTRG.20005	10.7513	0.00529275	0.0396103	3.42644	2.27632
ENSG00000170439	METTL7B	MSTRG.5422	2.35782	0.00658615	0.0439394	1.23745	2.18137
ENSG00000170345	FOS	MSTRG.7270	2.08555	0.00456428	0.0369592	1.06043	2.34063
ENSG00000170099	SERPINA6	MSTRG.7402	3.24734	0.000445589	0.016081	1.69926	3.35107
ENSG00000170017	ALCAM	MSTRG.17538	0.453712	0.000364284	0.0150983	-1.14015	3.43856
ENSG00000169733	RFNG	MSTRG.11518	0.487591	0.0213844	0.0811417	-1.03626	1.6699
ENSG00000169715	MT1E	MSTRG.9382	11.4092	0.00285795	0.0295208	3.51213	2.54395
ENSG00000169710	FASN	MSTRG.11517	2.51723	0.00103766	0.0201111	1.33184	2.98394
ENSG00000169429	CXCL8	MSTRG.18665	3.08714	0.00846555	0.0486578	1.62627	2.07235
ENSG00000169174	PCSK9	MSTRG.955	10.5348	4.5741e-05	0.0119133	3.39709	4.33969
ENSG00000169047	IRS1	MSTRG.15074	0.328091	0.000837695	0.0183148	-1.60783	3.07691
ENSG00000169016	E2F6	MSTRG.13557	0.434073	0.0483318	0.131526	-1.20399	1.31577
ENSG00000168906	MAT2A	MSTRG.14170	0.230417	0.000723391	0.0176328	-2.11768	3.14063
ENSG00000168743	NPNT	MSTRG.18833	0.112717	5.29999e-05	0.0119133	-3.14922	4.27572
ENSG00000168591	TMUB2	MSTRG.10814	2.3757	0.0225878	0.0834343	1.24835	1.64613
ENSG00000168496	FEN1	MSTRG.3992	5.93559	0.000167852	0.0128425	2.56939	3.77507
ENSG00000168077	SCARA3	MSTRG.23097	2.62996	0.00239843	0.0273026	1.39504	2.62007
ENSG00000168028	RPSA	MSTRG.17093	0.477337	0.000112082	0.0119133	-1.06692	3.95046
ENSG00000167995	BEST1	MSTRG.3994	0.112013	0.000283687	0.0138585	-3.15826	3.54716
ENSG00000167779	IGFBP6	MSTRG.5368	3.91022	0.00446083	0.0365903	1.96725	2.35058
ENSG00000167614	TTYH1	MSTRG.13325	0.26477	0.00765216	0.0463725	-1.91719	2.11622
ENSG00000167552	TUBA1A	MSTRG.5283	2.53575	0.00837089	0.0484202	1.34241	2.07723
ENSG00000167508	MVD	MSTRG.9857	9.90673	0.000114316	0.0119133	3.30841	3.94189
ENSG00000167363	FN3K	MSTRG.11556	0.0682389	0.000377289	0.0150983	-3.87326	3.42333
ENSG00000167244	IGF2	MSTRG.3561	0.495221	0.000221988	0.0132592	-1.01386	3.65367
ENSG00000166866	MYO1A	MSTRG.5481	2.09303	0.000281882	0.0138585	1.06559	3.54993
ENSG00000166681	NGFRAP1	MSTRG.25321	6.94456	0.00156055	0.0234525	2.79588	2.80672
ENSG00000166598	HSP90B1	MSTRG.5817	0.425213	0.000566275	0.0166254	-1.23374	3.24697
ENSG00000166046	TCP11L2	MSTRG.5840	0.441413	0.0337879	0.106017	-1.1798	1.47124
ENSG00000166012	TAF1D	MSTRG.4489	0.498778	0.00239795	0.0273026	-1.00353	2.62016
ENSG00000165828	PRAP1	MSTRG.3465	2.34269	0.00217202	0.0260519	1.22816	2.66314
ENSG00000165410	CFL2	MSTRG.6867	2.27406	0.000285586	0.0138585	1.18527	3.54426
ENSG00000165215	CLDN3	MSTRG.22154	2.64807	0.00345486	0.032366	1.40494	2.46157
ENSG00000165209	STRBP	MSTRG.24434	0.40815	0.0161766	0.0691095	-1.29283	1.79111
ENSG00000165092	ALDH1A1	MSTRG.24114	2.23694	0.00209771	0.0257691	1.16153	2.67825
ENSG00000164867	NOS3	MSTRG.22814	4.26678	6.80736e-05	0.0119133	2.09315	4.16702
ENSG00000164830	OXR1	MSTRG.23571	0.486156	0.000496286	0.016081	-1.04051	3.30427
ENSG00000164292	RHOBTB3	MSTRG.19681	0.470737	0.00189099	0.0254136	-1.08701	2.72331
ENSG00000164266	SPINK1	MSTRG.20097	0.273466	0.015831	0.068275	-1.87057	1.80049
ENSG00000164251	F2RL1	MSTRG.19559	2.08887	0.00696554	0.0447174	1.06272	2.15704
ENSG00000164211	STARD4	MSTRG.19760	2.99708	0.00205152	0.0257645	1.58356	2.68792
ENSG00000164089	ETNPPL	MSTRG.18850	2.12948	0.035117	0.108316	1.0905	1.45448
ENSG00000163874	ZC3H12A	MSTRG.662	2.39649	0.000481024	0.016081	1.26092	3.31783
ENSG00000163710	PCOLCE2	MSTRG.17859	3.5245	7.22232e-05	0.0119133	1.81742	4.14132
ENSG00000163703	CRELD1	MSTRG.16876	0.479855	0.0228412	0.0840774	-1.05933	1.64128
ENSG00000163701	IL17RE	MSTRG.16871	3.78455	0.0107184	0.0552771	1.92012	1.96987
ENSG00000163586	FABP1	MSTRG.14214	8.00864	0.00060286	0.0166254	3.00156	3.21978
ENSG00000163536	SERPINI1	MSTRG.17985	2.65082	0.0261048	0.0904349	1.40644	1.58328
ENSG00000163191	S100A11	MSTRG.1659	3.90321	0.00710016	0.0447174	1.96466	2.14873
ENSG00000162174	ASRGL1	MSTRG.4000	2.95798	0.000752772	0.0176328	1.56461	3.12334
ENSG00000162032	SPSB3	MSTRG.8651	0.425287	0.0224043	0.0830463	-1.23349	1.64967
ENSG00000161618	ALDH16A1	MSTRG.13200	0.489664	3.81921e-05	0.0119133	-1.03014	4.41803
ENSG00000161031	PGLYRP2	MSTRG.12545	2.24095	0.00713755	0.0447251	1.16411	2.14645
ENSG00000160752	FDPS	MSTRG.1744	4.94533	0.000464189	0.016081	2.30607	3.33331
ENSG00000160678	S100A1	MSTRG.1668	2.65812	0.00131634	0.0221962	1.41041	2.88063
ENSG00000160326	SLC2A6	MSTRG.24633	2.21123	0.00234914	0.0270534	1.14485	2.62909
ENSG00000160285	LSS	MSTRG.16222	6.78138	0.000648613	0.0171625	2.76158	3.18801
ENSG00000160211	G6PD	MSTRG.25572	2.1314	0.0052485	0.0393916	1.0918	2.27997
ENSG00000158874	APOA2	MSTRG.1830	2.27064	0.0105307	0.0546926	1.1831	1.97754
ENSG00000157985	AGAP1	MSTRG.15158	0.46311	0.0219422	0.0820991	-1.11057	1.65872
ENSG00000157379	DHRS1	MSTRG.6805	2.40237	0.004552	0.0369592	1.26446	2.3418
ENSG00000157326	DHRS4	MSTRG.6792	2.3244	0.00543053	0.0403293	1.21686	2.26516
ENSG00000156510	HKDC1	MSTRG.2889	2.60362	0.00212785	0.0258637	1.38052	2.67206
ENSG00000156381	ANKRD9	MSTRG.7478	2.01209	0.0327705	0.104318	1.0087	1.48452
ENSG00000155621	C9orf85	MSTRG.24112	0.483237	0.00584219	0.0416354	-1.0492	2.23342
ENSG00000155368	DBI	MSTRG.14422	2.72805	0.00124256	0.0214646	1.44787	2.90568
ENSG00000155366	RHOC	MSTRG.1364	2.06764	0.00231563	0.0267816	1.04799	2.63533
ENSG00000155093	PTPRN2	MSTRG.22873	2.04482	0.0257429	0.0895716	1.03197	1.58934
ENSG00000153208	MERTK	MSTRG.14363	0.366301	0.00201551	0.025574	-1.4489	2.69562
ENSG00000153132	CLGN	MSTRG.18977	0.359818	0.000112619	0.0119133	-1.47466	3.94839
ENSG00000152782	PANK1	MSTRG.3101	4.29869	0.00262745	0.0288357	2.1039	2.58047
ENSG00000151327	FAM177A1	MSTRG.6883	2.54661	0.000471221	0.016081	1.34858	3.32678
ENSG00000150787	PTS	MSTRG.4572	2.07373	0.00362103	0.0331684	1.05223	2.44117
ENSG00000149485	FADS1	MSTRG.3993	3.18176	0.000594209	0.0166254	1.66982	3.22606
ENSG00000149428	HYOU1	MSTRG.4677	0.373481	0.000512949	0.016081	-1.42089	3.28993
ENSG00000148965	SAA4	MSTRG.3730	3.07683	0.000264521	0.0138373	1.62144	3.57754
ENSG00000148926	ADM	MSTRG.3670	2.00001	0.034713	0.107487	1.00001	1.45951
ENSG00000148795	CYP17A1	MSTRG.3274	8.54055	0.000192201	0.0132592	3.09433	3.71624
ENSG00000148677	ANKRD1	MSTRG.3110	3.57937	0.0068936	0.0446714	1.8397	2.16155
ENSG00000148468	FAM171A1	MSTRG.2569	0.480901	0.00457557	0.0369592	-1.05619	2.33955
ENSG00000148180	GSN	MSTRG.24414	2.00366	0.00196509	0.0254136	1.00264	2.70662
ENSG00000147400	CETN2	MSTRG.25525	2.10947	0.0251014	0.0886906	1.07688	1.6003
ENSG00000147383	NSDHL	MSTRG.25526	3.37695	0.000804865	0.0183006	1.75572	3.09428
ENSG00000146678	IGFBP1	MSTRG.22024	0.289676	0.00148455	0.0229877	-1.78749	2.82841
ENSG00000146386	ABRACL	MSTRG.21444	2.95274	0.00324674	0.031272	1.56205	2.48855
ENSG00000145425	RPS3A	MSTRG.19021	0.428389	2.33801e-05	0.0119133	-1.22301	4.63115
ENSG00000144802	NFKBIZ	MSTRG.17536	2.17239	0.00373362	0.0337229	1.11928	2.42787
ENSG00000144485	HES6	MSTRG.15178	3.07748	0.000952054	0.019632	1.62175	3.02134
ENSG00000144035	NAT8	MSTRG.14083	4.51066	0.00404399	0.0351538	2.17334	2.39319
ENSG00000143862	ARL8A	MSTRG.2090	2.277	0.0012232	0.0212456	1.18713	2.9125
ENSG00000143382	ADAMTSL4	MSTRG.1597	4.22248	0.00296411	0.0299093	2.07809	2.52811
ENSG00000142910	TINAGL1	MSTRG.571	0.442965	0.00118946	0.021071	-1.17474	2.92465
ENSG00000142541	RPL13A	MSTRG.13200	0.489664	3.81921e-05	0.0119133	-1.03014	4.41803
ENSG00000142082	SIRT3	MSTRG.3502	3.23006	0.0112971	0.0563509	1.69156	1.94703
ENSG00000141994	DUS3L	MSTRG.12263	0.468979	0.00152328	0.0231929	-1.0924	2.81722
ENSG00000141577	CEP131	MSTRG.11453	2.90803	0.00977138	0.0527009	1.54004	2.01004
ENSG00000141576	RNF157	MSTRG.11349	0.296737	0.00074138	0.0176328	-1.75275	3.12996
ENSG00000140836	ZFHX3	MSTRG.9670	0.442534	0.00691043	0.0446893	-1.17614	2.16049
ENSG00000140545	MFGE8	MSTRG.8418	3.12315	0.0134734	0.0620207	1.643	1.87052
ENSG00000140465	CYP1A1	MSTRG.8217	2.65932	0.000298643	0.0141677	1.41106	3.52485
ENSG00000140297	GCNT3	MSTRG.8017	2.74717	9.51811e-05	0.0119133	1.45795	4.02145
ENSG00000140105	WARS	MSTRG.7450	0.464401	0.00308511	0.0305403	-1.10656	2.51073
ENSG00000139428	MMAB	MSTRG.5881	2.64141	0.00198318	0.0254136	1.40131	2.70264
ENSG00000139292	LGR5	MSTRG.5632	0.333011	0.00764263	0.0463725	-1.58636	2.11676
ENSG00000139194	RBP5	MSTRG.4919	2.56523	0.00701073	0.0447174	1.35909	2.15424
ENSG00000138449	SLC40A1	MSTRG.14805	2.84898	0.000187311	0.0132592	1.51045	3.72744
ENSG00000137561	TTPA	MSTRG.23289	2.16854	0.0374538	0.113174	1.11672	1.4265
ENSG00000137285	TUBB2B	MSTRG.20412	2.85414	0.00190551	0.0254136	1.51306	2.71999
ENSG00000137267	TUBB2A	MSTRG.20412	2.85414	0.00190551	0.0254136	1.51306	2.71999
ENSG00000137154	RPS6	MSTRG.23907	0.49335	0.000221204	0.0132592	-1.01932	3.65521
ENSG00000136689	IL1RN	MSTRG.14377	0.473628	0.00137429	0.0224586	-1.07817	2.86192
ENSG00000136305	CIDEB	MSTRG.6807	3.40084	0.000375918	0.0150983	1.76589	3.42491
ENSG00000135318	NT5E	MSTRG.21151	3.04277	0.000721205	0.0176328	1.60539	3.14194
ENSG00000135220	UGT2A3	MSTRG.18626	0.438824	0.00511929	0.0391146	-1.18829	2.29079
ENSG00000134824	FADS2	MSTRG.3992	5.93559	0.000167852	0.0128425	2.56939	3.77507
ENSG00000134716	CYP2J2	MSTRG.995	2.6993	5.50755e-05	0.0119133	1.43258	4.25904
ENSG00000134590	FAM127A	MSTRG.25481	2.81461	0.00287489	0.0295722	1.49294	2.54138
ENSG00000134330	IAH1	MSTRG.13523	2.17532	0.0465282	0.128298	1.12123	1.33228
ENSG00000134324	LPIN1	MSTRG.13566	6.28351	0.0148434	0.0661285	2.65157	1.82847
ENSG00000134247	PTGFRN	MSTRG.1404	0.473656	0.00088404	0.0190503	-1.07809	3.05353
ENSG00000134240	HMGCS2	MSTRG.1437	2.34374	0.00715233	0.0447513	1.22881	2.14555
ENSG00000134107	BHLHE40	MSTRG.16832	3.39595	0.000317807	0.0144307	1.76382	3.49784
ENSG00000133935	C14orf1	MSTRG.7290	4.0179	0.00042434	0.0160451	2.00644	3.37229
ENSG00000133112	TPT1	MSTRG.6395	0.448275	0.000815838	0.0183006	-1.15754	3.0884
ENSG00000132688	NES	MSTRG.1783	2.82566	0.00025503	0.0137291	1.49859	3.59341
ENSG00000132313	MRPL35	MSTRG.14179	3.23225	0.00204039	0.0257357	1.69254	2.69029
ENSG00000132196	HSD17B7	MSTRG.1854	2.57373	0.00587414	0.0417228	1.36386	2.23106
ENSG00000131981	LGALS3	MSTRG.7038	4.38449	0.0011812	0.021071	2.13241	2.92768
ENSG00000131791	PRKAB2	MSTRG.1505	0.425892	0.00488068	0.0382834	-1.23144	2.31152
ENSG00000131746	TNS4	MSTRG.10695	3.01733	0.0124531	0.0593879	1.59327	1.90472
ENSG00000131473	ACLY	MSTRG.10717	3.29255	0.000168823	0.0128425	1.7192	3.77257
ENSG00000131069	ACSS2	MSTRG.15549	7.77824	0.000485715	0.016081	2.95944	3.31362
ENSG00000130487	KLHDC7B	MSTRG.16804	0.107474	2.21345e-05	0.0119133	-3.21794	4.65493
ENSG00000130347	RTN4IP1	MSTRG.21222	3.19259	0.0282219	0.094524	1.67473	1.54941
ENSG00000130164	LDLR	MSTRG.12411	3.69201	0.00888011	0.050024	1.88441	2.05158
ENSG00000129562	DAD1	MSTRG.6753	2.47204	0.000535013	0.0165101	1.3057	3.27164
ENSG00000129354	AP1M2	MSTRG.12392	5.40527	0.000355648	0.0150983	2.43437	3.44898
ENSG00000127824	TUBA4A	MSTRG.15042	2.48791	0.00871971	0.0495364	1.31494	2.0595
ENSG00000127743	IL17B	MSTRG.20113	5.9413	0.00120651	0.0210743	2.57078	2.91847
ENSG00000127511	SIN3B	MSTRG.12581	0.283077	0.0449371	0.125666	-1.82074	1.34739
ENSG00000127337	YEATS4	MSTRG.5615	2.49147	0.000166455	0.0128425	1.317	3.7787
ENSG00000126709	IFI6	MSTRG.503	2.05556	0.00641613	0.0435297	1.03953	2.19273
ENSG00000126231	PROZ	MSTRG.6649	2.32305	0.000575374	0.0166254	1.21602	3.24005
ENSG00000125657	TNFSF9	MSTRG.12288	2.38782	0.00495293	0.0385891	1.2557	2.30514
ENSG00000125434	SLC25A35	MSTRG.10171	2.10568	0.00167577	0.0241099	1.07428	2.77578
ENSG00000125378	BMP4	MSTRG.7022	0.451823	0.00047706	0.016081	-1.14617	3.32143
ENSG00000125148	MT2A	MSTRG.9381	6.18891	0.00235416	0.0270622	2.62968	2.62816
ENSG00000125144	MT1G	MSTRG.9392	15.2961	0.0022996	0.0267351	3.93509	2.63835
ENSG00000124942	AHNAK	MSTRG.4003	2.13484	0.0182202	0.0737274	1.09413	1.73945
ENSG00000124767	GLO1	MSTRG.20883	2.17643	0.00102713	0.0201111	1.12196	2.98838
ENSG00000124253	PCK1	MSTRG.15781	2.3516	0.00401143	0.0350707	1.23364	2.3967
ENSG00000124145	SDC4	MSTRG.15677	2.59997	0.000911595	0.0192525	1.37849	3.0402
ENSG00000122861	PLAU	MSTRG.2978	3.38334	0.0339766	0.106514	1.75845	1.46882
ENSG00000122378	FAM213A	MSTRG.3055	2.01452	0.00538477	0.0400566	1.01044	2.26883
ENSG00000122194	PLG	MSTRG.21632	5.11627	9.83185e-05	0.0119133	2.35509	4.00736
ENSG00000122121	XPNPEP2	MSTRG.25435	2.22637	0.000394828	0.0153381	1.1547	3.40359
ENSG00000121064	SCPEP1	MSTRG.11035	2.26838	0.0028338	0.0295047	1.18166	2.54763
ENSG00000120437	ACAT2	MSTRG.21627	3.74009	0.000276131	0.0138373	1.90307	3.55888
ENSG00000120071	KANSL1	MSTRG.10880	0.483889	0.0389065	0.115628	-1.04725	1.40998
ENSG00000119888	EPCAM	MSTRG.13835	0.308208	0.000230142	0.0133001	-1.69803	3.638
ENSG00000118804	STBD1	MSTRG.18687	4.99325	0.00773782	0.0466249	2.31998	2.11138
ENSG00000118785	SPP1	MSTRG.18743	0.291652	8.32966e-05	0.0119133	-1.77768	4.07937
ENSG00000118271	TTR	MSTRG.11812	6.64159	0.00013203	0.0122089	2.73153	3.87933
ENSG00000118137	APOA1	MSTRG.4615	2.04006	0.00603155	0.0419503	1.02861	2.21957
ENSG00000116774	OLFML3	MSTRG.1386	3.14111	0.0197008	0.077403	1.65128	1.70552
ENSG00000116062	MSH6	MSTRG.13853	2.0922	0.0491402	0.133099	1.06502	1.30856
ENSG00000115457	IGFBP2	MSTRG.15002	3.66672	0.00110126	0.0206147	1.87449	2.95811
ENSG00000115009	CCL20	MSTRG.15086	3.09772	0.000583442	0.0166254	1.63121	3.234
ENSG00000114854	TNNC1	MSTRG.17327	3.91442	0.00148063	0.0229877	1.9688	2.82955
ENSG00000114631	PODXL2	MSTRG.17704	2.03692	0.00398201	0.0349636	1.02639	2.3999
ENSG00000114268	PFKFB4	MSTRG.17217	2.35658	0.00169446	0.0242123	1.2367	2.77097
ENSG00000113889	KNG1	MSTRG.18141	4.06165	0.000845118	0.0183987	2.02207	3.07308
ENSG00000113552	GNPDA1	MSTRG.20068	2.97975	0.00952411	0.0518807	1.57519	2.02118
ENSG00000113161	HMGCR	MSTRG.19543	3.67668	0.0027894	0.0295047	1.8784	2.55449
ENSG00000113140	SPARC	MSTRG.20156	0.228531	0.000148586	0.0128425	-2.12954	3.82802
ENSG00000113083	LOX	MSTRG.19820	2.32129	0.00250617	0.0281479	1.21492	2.60099
ENSG00000112972	HMGCS1	MSTRG.19360	9.45164	0.000154144	0.0128425	3.24056	3.81207
ENSG00000112818	MEP1A	MSTRG.20988	2.19831	0.00428668	0.0359154	1.13639	2.36788
ENSG00000112667	DNPH1	MSTRG.20931	2.40636	0.00184817	0.0251182	1.26685	2.73326
ENSG00000112337	SLC17A2	MSTRG.20560	0.349153	0.00163598	0.0240157	-1.51807	2.78622
ENSG00000112320	SOBP	MSTRG.21234	0.380517	0.0235229	0.0855953	-1.39397	1.62851
ENSG00000112299	VNN1	MSTRG.21405	4.88989	0.000372557	0.0150983	2.2898	3.42881
ENSG00000112096	SOD2	MSTRG.21623	2.0845	4.74793e-05	0.0119133	1.0597	4.3235
ENSG00000111846	GCNT2	MSTRG.20459	2.32625	1.98507e-06	0.0119133	1.21801	5.70222
ENSG00000111319	SCNN1A	MSTRG.4860	6.02442	0.00196428	0.0254136	2.59082	2.7068
ENSG00000110921	MVK	MSTRG.5882	8.37666	0.000369124	0.0150983	3.06637	3.43283
ENSG00000110756	HPS5	MSTRG.3731	2.05732	0.0324238	0.103614	1.04077	1.48914
ENSG00000110244	APOA4	MSTRG.4612	4.60121	0.000486927	0.016081	2.20201	3.31254
ENSG00000110243	APOA5	MSTRG.4611	2.07382	7.18823e-05	0.0119133	1.05229	4.14338
ENSG00000110169	HPX	MSTRG.3620	3.42696	0.00075369	0.0176328	1.77693	3.12281
ENSG00000109929	SC5D	MSTRG.4717	4.25927	0.000208834	0.0132592	2.0906	3.6802
ENSG00000109819	PPARGC1A	MSTRG.18425	0.434015	0.000266439	0.0138373	-1.20418	3.5744
ENSG00000109193	SULT1E1	MSTRG.18645	3.765	0.000167275	0.0128425	1.91265	3.77657
ENSG00000109181	UGT2B10	MSTRG.18624	2.17015	0.00328324	0.0313858	1.1178	2.4837
ENSG00000109107	ALDOC	MSTRG.10423	5.12479	0.000564409	0.0166254	2.35749	3.24841
ENSG00000109099	PMP22	MSTRG.10229	4.60545	0.0440127	0.124158	2.20334	1.35642
ENSG00000109084	TMEM97	MSTRG.10402	3.09818	0.00278669	0.0295047	1.63142	2.55491
ENSG00000108946	PRKAR1A	MSTRG.11234	2.18192	0.0194804	0.0767744	1.1256	1.7104
ENSG00000107984	DKK1	MSTRG.2827	2.18433	0.00688669	0.0446714	1.12719	2.16199
ENSG00000107798	LIPA	MSTRG.3092	2.41214	0.00120287	0.0210743	1.27032	2.91978
ENSG00000107537	PHYH	MSTRG.2540	2.0664	0.000448152	0.016081	1.04712	3.34858
ENSG00000106853	PTGR1	MSTRG.24346	4.14203	0.00529632	0.0396103	2.05034	2.27603
ENSG00000106366	SERPINE1	MSTRG.22418	2.59906	0.00137382	0.0224586	1.37799	2.86207
ENSG00000106333	PCOLCE	MSTRG.22406	3.90591	0.00018966	0.0132592	1.96566	3.72203
ENSG00000106258	CYP3A5	MSTRG.22361	2.12495	0.00343793	0.0323298	1.08743	2.4637
ENSG00000106211	HSPB1	MSTRG.22203	2.37762	0.00563357	0.040999	1.24952	2.24922
ENSG00000106034	CPED1	MSTRG.22560	0.36379	0.00168065	0.0241171	-1.45882	2.77452
ENSG00000105607	GCDH	MSTRG.12475	0.482916	0.000384761	0.0150983	-1.05016	3.41481
ENSG00000105398	SULT2A1	MSTRG.13136	2.23487	0.000580587	0.0166254	1.16019	3.23613
ENSG00000105193	RPS16	MSTRG.12913	0.495385	0.000275137	0.0138373	-1.01338	3.56045
ENSG00000104549	SQLE	MSTRG.23626	6.04322	0.000182319	0.0132592	2.59532	3.73917
ENSG00000103888	CEMIP	MSTRG.8331	0.495058	0.00515284	0.0392602	-1.01433	2.28795
ENSG00000103485	QPRT	MSTRG.9172	2.08027	0.000341587	0.0149756	1.05677	3.4665
ENSG00000103187	COTL1	MSTRG.9797	3.67413	0.000946022	0.0196034	1.8774	3.0241
ENSG00000103034	NDRG4	MSTRG.9459	3.10355	0.00388241	0.03447	1.63392	2.4109
ENSG00000102109	PCSK1N	MSTRG.25095	2.41805	0.00217869	0.0260828	1.27385	2.6618
ENSG00000102024	PLS3	MSTRG.25367	2.04659	0.000223177	0.0132592	1.03323	3.65135
ENSG00000101335	MYL9	MSTRG.15591	2.34031	0.00170699	0.0242322	1.2267	2.76777
ENSG00000101230	ISM1	MSTRG.15363	0.391068	0.00980173	0.05276	-1.35451	2.0087
ENSG00000101104	PABPC1L	MSTRG.15671	0.372677	0.0057225	0.0412104	-1.424	2.24241
ENSG00000101049	SGK2	MSTRG.15648	2.5677	0.00263112	0.0288357	1.36048	2.57986
ENSG00000100979	PLTP	MSTRG.15699	2.47886	0.00480702	0.0381025	1.30968	2.31812
ENSG00000100934	SEC23A	MSTRG.6921	2.77413	6.96152e-05	0.0119133	1.47203	4.1573
ENSG00000100593	ISM2	MSTRG.7306	2.06014	0.026748	0.0914275	1.04274	1.57271
ENSG00000100575	TIMM9	MSTRG.7075	0.435393	0.00122103	0.0212456	-1.19961	2.91327
ENSG00000100568	VTI1B	MSTRG.7164	2.26994	0.00347242	0.0324487	1.18265	2.45937
ENSG00000100473	COCH	MSTRG.6837	2.32862	5.69934e-05	0.0119133	1.21948	4.24418
ENSG00000100439	ABHD4	MSTRG.6721	3.70429	0.000167967	0.0128425	1.8892	3.77478
ENSG00000100399	CHADL	MSTRG.16683	0.251349	0.00351596	0.0326291	-1.99223	2.45396
ENSG00000100373	UPK3A	MSTRG.16746	2.94382	0.000191859	0.0132592	1.55769	3.71702
ENSG00000100344	PNPLA3	MSTRG.16737	2.88231	0.00170248	0.0242322	1.52723	2.76892
ENSG00000100342	APOL1	MSTRG.16574	2.23288	0.000462977	0.016081	1.1589	3.33444
ENSG00000100211	CBY1	MSTRG.16632	2.80427	0.0446301	0.12526	1.48762	1.35037
ENSG00000100196	KDELR3	MSTRG.16622	3.90228	0.0020683	0.0257645	1.96432	2.68439
ENSG00000100100	PIK3IP1	MSTRG.16523	4.61499	0.00696179	0.0447174	2.20633	2.15728
ENSG00000100097	LGALS1	MSTRG.16598	3.26301	0.00152415	0.0231929	1.7062	2.81697
ENSG00000099994	SUSD2	MSTRG.16397	3.63451	0.000494923	0.016081	1.86176	3.30546
ENSG00000099284	H2AFY2	MSTRG.2894	0.418925	0.00107326	0.0203057	-1.25524	2.96929
ENSG00000099250	NRP1	MSTRG.2688	0.417989	0.042482	0.121582	-1.25846	1.3718
ENSG00000099194	SCD	MSTRG.3219	5.83162	4.7532e-05	0.0119133	2.5439	4.32301
ENSG00000090382	LYZ	MSTRG.5615	2.49147	0.000166455	0.0128425	1.317	3.7787
ENSG00000089022	MAPKAPK5	MSTRG.5921	0.491906	0.00936902	0.0513882	-1.02355	2.02831
ENSG00000087842	PIR	MSTRG.24891	2.48553	0.0284916	0.0948277	1.31355	1.54528
ENSG00000087586	AURKA	MSTRG.15771	0.47819	0.0206853	0.0795022	-1.06434	1.68434
ENSG00000086619	ERO1B	MSTRG.2394	0.477084	0.000259162	0.0137291	-1.06769	3.58643
ENSG00000084636	COL16A1	MSTRG.580	0.336447	0.00136855	0.0224586	-1.57155	2.86374
ENSG00000082146	STRADB	MSTRG.14907	2.00118	0.0139707	0.063437	1.00085	1.85478
ENSG00000081870	HSPB11	MSTRG.936	2.05094	0.00978245	0.0527009	1.03628	2.00955
ENSG00000081059	TCF7	MSTRG.19904	0.49058	0.0401056	0.118142	-1.02744	1.39679
ENSG00000081051	AFP	MSTRG.18662	3.79624	0.000167775	0.0128425	1.92457	3.77527
ENSG00000079459	FDFT1	MSTRG.22944	5.48294	0.000221789	0.0132592	2.45495	3.65406
ENSG00000078081	LAMP3	MSTRG.18072	0.422254	0.0101608	0.0536477	-1.24382	1.99307
ENSG00000078061	ARAF	MSTRG.25068	0.282854	0.0136202	0.062425	-1.82187	1.86582
ENSG00000077782	FGFR1	MSTRG.23183	0.425719	0.0332519	0.105113	-1.23203	1.47818
ENSG00000077348	EXOSC5	MSTRG.12973	0.439649	0.0173606	0.0722666	-1.18558	1.76044
ENSG00000076003	MCM6	MSTRG.14523	3.13274	0.000486308	0.016081	1.64742	3.31309
ENSG00000072274	TFRC	MSTRG.18204	2.20672	0.0173817	0.0722666	1.14191	1.75991
ENSG00000072042	RDH11	MSTRG.7164	2.26994	0.00347242	0.0324487	1.18265	2.45937
ENSG00000071537	SEL1L	MSTRG.7329	0.496275	0.00505148	0.0389712	-1.01079	2.29658
ENSG00000071054	MAP4K4	MSTRG.14292	0.483041	0.00700339	0.0447174	-1.04978	2.15469
ENSG00000068366	ACSL4	MSTRG.25351	2.09775	0.00571816	0.0412104	1.06884	2.24274
ENSG00000067082	KLF6	MSTRG.2490	2.15477	0.00180355	0.0247094	1.10753	2.74387
ENSG00000067064	IDI1	MSTRG.2488	4.94543	0.000243893	0.0137206	2.3061	3.6128
ENSG00000065911	MTHFD2	MSTRG.14104	0.418915	0.00147903	0.0229877	-1.25527	2.83002
ENSG00000052841	TTC17	MSTRG.3856	0.499483	1.08817e-05	0.0119133	-1.00149	4.9633
ENSG00000052802	MSMO1	MSTRG.19084	9.97506	0.000137547	0.0124912	3.31833	3.86155
ENSG00000050426	LETMD1	MSTRG.5342	0.419036	2.25778e-05	0.0119133	-1.25485	4.64632
ENSG00000047457	CP	MSTRG.17882	3.37514	0.00380616	0.034015	1.75495	2.41951
ENSG00000044574	HSPA5	MSTRG.24466	0.482752	0.00148046	0.0229877	-1.05064	2.8296
ENSG00000039068	CDH1	MSTRG.9565	2.17779	0.0045211	0.036847	1.12286	2.34476
ENSG00000035862	TIMP2	MSTRG.11408	2.79007	0.000645489	0.0171625	1.4803	3.19011
ENSG00000034510	TMSB10	MSTRG.14153	2.72412	0.000816535	0.0183006	1.44579	3.08802
ENSG00000019186	CYP24A1	MSTRG.15767	10.4257	0.000481112	0.016081	3.38207	3.31775
ENSG00000017483	SLC38A5	MSTRG.25080	0.242378	0.000503886	0.016081	-2.04467	3.29767
ENSG00000015413	DPEP1	MSTRG.9894	2.06815	0.00214018	0.0259055	1.04834	2.66955
ENSG00000011021	CLCN6	MSTRG.262	2.05202	0.00901048	0.0503844	1.03704	2.04525
ENSG00000009724	MASP2	MSTRG.239	2.83625	0.0129638	0.06073	1.50398	1.88727
ENSG00000008517	IL32	MSTRG.8744	2.29949	0.00358063	0.0330002	1.20131	2.44604
ENSG00000008513	ST3GAL1	MSTRG.23666	0.417599	0.00459034	0.0370315	-1.25981	2.33816
ENSG00000008394	MGST1	MSTRG.5039	2.17925	0.0106204	0.0549787	1.12383	1.97386
ENSG00000007384	RHBDF1	MSTRG.8553	2.66483	0.00202736	0.0256732	1.41404	2.69307
ENSG00000007047	MARK4	MSTRG.13055	0.490879	0.00925706	0.0510382	-1.02656	2.03353
ENSG00000006652	IFRD1	MSTRG.22535	0.49467	0.000306727	0.0143914	-1.01546	3.51325
ENSG00000006016	CRLF1	MSTRG.12656	0.378633	0.00838587	0.048425	-1.40113	2.07645
ENSG00000001630	CYP51A1	MSTRG.22285	5.84048	0.000518131	0.0161459	2.54609	3.28556

## Sheet: RNASeqEnrichment
# background genes	# genes	category	description	FDR value	genes	p-value	term name	Fold Enrichment
10	6	Reactome Pathways	Metallothioneins bind metals	5.62E-5	MT2A|MT1A|MT1F|MT1G|MT1M|MT1X	3.2E-7	HSA-5661231	30.5719
47	22	WikiPathways	Cholesterol metabolism with Bloch and Kandutsch-Russell pathways	1.73E-18	CYP51A1|MVK|HSD17B7|MSMO1|SC5D|SQLE|FADS2|HMGCR|MVD|FASN|FADS1|HMGCS1|ACSL4|DHCR7|FDPS|ACAT2|HMGCS2|NSDHL|SCD|IDI1|LSS|FDFT1	2.22E-21	WP4718	23.8504
16	6	WikiPathways	SREBF and miR33 in cholesterol and lipid homeostasis	1.0E-4	PPARGC1A|HMGCR|FASN|HMGCS1|SCD|LDLR	2.71E-6	WP2011	19.1074
29	10	WikiPathways	Statin inhibition of cholesterol production	1.76E-7	PDIA2|APOA1|SQLE|HMGCR|APOA4|APOA2|PLTP|APOA5|LDLR|FDFT1	2.25E-9	WP430	17.57
16	5	WikiPathways	Sulfation biotransformation reaction	0.0011	SULT2A1|SULT1E1|SULT1C2|SULT1A4|G6PD	3.94E-5	WP692	15.9229
30	8	WikiPathways	Oxidative stress response	2.13E-5	JUNB|FOS|MAOA|GPX3|MT1X|CYP1A1|MGST1|SOD2	4.92E-7	WP408	13.5875
43	8	Reactome Pathways	Binding and Uptake of Ligands by Scavenger Receptors	6.4E-4	SPARC|APOA1|HPX|HSP90B1|APOL1|HP|HPR|HYOU1	5.16E-6	HSA-2173782	9.47965
29	5	WikiPathways	Lipid metabolism pathway	0.0084	ACSS2|PRKAB2|FASN|PRKAR1A|ACLY	4.4E-4	WP3965	8.78502
30	5	Reactome Pathways	FOXO-mediated transcription of oxidative stress, metabolic and neuronal genes	0.032	PPARGC1A|IGFBP1|PCK1|SIRT3|SOD2	5.0E-4	HSA-9615017	8.49219
124	18	Reactome Pathways	Regulation of Insulin-like Growth Factor (IGF) transport and uptake by Insulin-like Growth Factor Binding Proteins (IGFBPs)	8.24E-8	LGALS1|IGFBP2|APOA1|BMP4|CP|MFGE8|IGFBP1|HSP90B1|IGFBP6|PCSK9|PLG|APOL1|APOA2|SPP1|AFP|IGF2|APOA5|KNG1	2.53E-10	HSA-381426	7.39642
58	8	WikiPathways	Complement and coagulation cascades	0.0011	SERPINE1|PLG|CD55|C8G|PLAU|MASP2|C1S|KNG1	3.62E-5	WP558	7.02802
38	5	WikiPathways	Immune infiltration in pancreatic cancer	0.0224	LGALS1|LGALS3|IL17B|CXCL8|CCL20	0.0013	WP5285	6.70436
41	5	KEGG Pathways	Porphyrin and chlorophyll metabolism	0.0275	UGT2A3|CP|UGT2B10|UGT2B11|MMAB	0.0018	hsa00860	6.2138
50	6	KEGG Pathways	Ovarian steroidogenesis	0.0153	HSD17B7|ACOT1|CYP17A1|CYP2J2|CYP1A1|LDLR	6.8E-4	hsa04913	6.11437
67	8	WikiPathways	Folate metabolism	0.0024	SERPINE1|APOA1|SAA4|PLG|GPX3|MTHFD2|SOD2|LDLR	9.17E-5	WP176	6.08396
52	6	KEGG Pathways	Glutathione metabolism	0.0173	NAT8|GSTA1|RRM2|GPX3|G6PD|MGST1	8.2E-4	hsa00480	5.87921
64	7	WikiPathways	Ferroptosis	0.0083	HSPB1|SLC40A1|CP|HMGCR|ACSL4|TFRC|FDFT1	4.1E-4	WP4313	5.573
55	6	WikiPathways	Pathogenic Escherichia coli infection	0.0191	TUBA4A|TUBB2B|CDH1|TUBB2A|CD14|TUBA1A	0.0011	WP2272	5.55852
79	8	Reactome Pathways	Amyloid fiber formation	0.0189	APOA1|TTR|LYZ|MFGE8|NAT8|APOA4|H3C12|GSN	2.6E-4	HSA-977225	5.15981
215	21	Reactome Pathways	Biological oxidations	1.68E-6	CYP51A1|CYP24A1|CYP4F2|SULT2A1|CYP3A5|SULT1E1|UGT2A3|ACSS2|UGT2B10|ALDH1A1|MAT2A|SULT1C2|GSTA1|MAOA|PODXL2|SULT1A4|CYP2J2|DPEP1|CYP1A1|MGST1|UGT2B11	5.9E-9	HSA-211859	4.97682
312	30	WikiPathways	Nuclear receptors meta-pathway	4.19E-10	SULT2A1|CYP3A5|APOA1|TNS4|BHLHE40|IL17B|PPARGC1A|MFGE8|IGFBP1|FABP1|JUNB|FASN|PCK1|GSTA1|CCL20|SCNN1A|APOA2|SCD|JUN|ANKRD1|SLC2A6|GPX3|G6PD|CYP1A1|MGST1|PTGR1|SLC39A10|PLTP|APOA5|DBI	4.29E-12	WP2882	4.89934
188	18	Reactome Pathways	Metabolism of vitamins and cofactors	2.08E-5	APOA1|TTR|NT5E|TTPA|PTS|NOS3|PANK1|FASN|APOA4|AKR1B10|VNN1|APOA2|SDC4|RDH11|MTHFD2|QPRT|MMAB|LDLR	9.63E-8	HSA-196854	4.87849
176	16	Reactome Pathways	Fatty acid metabolism	1.5E-4	CYP4F2|PRKAB2|PHYH|FADS2|FASN|ACOT1|FADS1|ACSL4|SCD|CYP2J2|DPEP1|ELOVL6|CYP1A1|PTGR1|ACLY|DBI	9.42E-7	HSA-8978868	4.6321
100	9	WikiPathways	Burn wound healing	0.0055	LGALS1|SPARC|TIMP2|S100A11|CXCL8|NFKBIZ|S100A6|FGFR1|TPT1	2.5E-4	WP5055	4.58578
126	11	Reactome Pathways	Platelet degranulation	0.0059	SERPINE1|SPARC|APOA1|TUBA4A|GTPBP2|PLG|HSPA5|TMSB4X|IGF2|VTI1B|KNG1	6.67E-5	HSA-114608	4.44829
130	11	WikiPathways	Adipogenesis	0.0023	PNPLA3|SERPINE1|BMP4|PPARGC1A|IRS1|PCK1|NR2F1|DLK1|SCD|LPIN1|KLF6	8.65E-5	WP236	4.31142
218	17	WikiPathways	Network map of SARS-CoV-2 signaling pathway	1.0E-4	SERPINE1|APOA1|LRG1|JUNB|FOS|CXCL8|APOL1|IFI6|HP|CCL20|RRM2|APOA2|JUN|GSN|RPS6|C1S|CD14	3.06E-6	WP5115	3.97341
760	39	Reactome Pathways	Cellular responses to stimuli	2.08E-5	EXOSC5|APOA1|MT2A|TUBA4A|TUBB2B|PPARGC1A|IGFBP1|MT1A|FABP1|HSP90B1|FOS|CXCL8|HSPA5|MT1F|GSTA1|MAP4K4|RPS3A|UBE2C|H3C12|SULT1A4|JUN|RPS16|SIN3B|MT1G|MT1M|TUBB2A|RPS6|GPX3|RPL13A|G6PD|MT1X|KDELR3|RPSA|H2AJ|TUBA1A|SOD2|MAPKAPK5|TXNIP|HYOU1	8.83E-8	HSA-8953897	2.6147
476	24	Reactome Pathways	Neutrophil degranulation	0.0035	TTR|STBD1|LGALS3|LYZ|COTL1|TIMP2|S100A11|ARL8A|LRG1|SLCO4C1|HP|GM2A|PNP|CD55|VNN1|PLAU|GSN|PTPRN2|ALDOC|MGST1|CD14|METTL7A|ACLY|OSCAR	3.8E-5	HSA-6798695	2.56907
271	13	WikiPathways	IL-18 signaling pathway	0.0449	HSPB1|UGT2B10|FOS|CXCL8|NFKBIZ|CCL20|JUN|SDC4|ZC3H12A|TMSB4X|SPP1|CLDN3|CLDN4	0.0034	WP4754	2.44425
428	18	WikiPathways	VEGFA-VEGFR2 signaling	0.0355	TMSB10|HSPB1|RHOC|NOS3|CXCL8|PNP|JUN|PLAU|DKK1|RPS6|TMSB4X|RPL13A|GIGYF2|SOD2|MAPKAPK5|TXNIP|NAP1L1|HYOU1	0.0025	WP3888	2.14289

## Sheet: Metaboanalyst
Pathway	matched_features
Glutathione metabolism	cpd:C00051; cpd:C00037; cpd:C00025; cpd:C00134; hsa:2878; hsa:2539; hsa:9027; hsa:2938; hsa:4257; hsa:6241
Terpenoid backbone biosynthesis	hsa:4598; hsa:39; hsa:3157; hsa:3158; hsa:3156; hsa:3422; hsa:4597; hsa:2224
Retinol metabolism	hsa:216; hsa:51109; hsa:1577; hsa:1543; hsa:10901; hsa:317749; hsa:10720; hsa:7365; hsa:79799
Steroid biosynthesis	hsa:6309; hsa:1717; hsa:1595; hsa:4047; hsa:50814; hsa:6307; hsa:51478; hsa:3988; hsa:1591; hsa:6713; hsa:2222
Aminoacyl-tRNA biosynthesis	cpd:C00064; cpd:C00037; cpd:C00049; cpd:C00183; cpd:C00041; cpd:C00047; cpd:C00123; cpd:C00188; cpd:C00148; cpd:C00025
Valine, leucine and isoleucine biosynthesis	cpd:C00188; cpd:C00671; cpd:C00123; cpd:C00183
Porphyrin and chlorophyll metabolism	cpd:C00037; cpd:C00025; hsa:326625; hsa:1356; hsa:10720; hsa:7365; hsa:79799
Synthesis and degradation of ketone bodies	hsa:3157; hsa:3158; hsa:39
Glyoxylate and dicarboxylate metabolism	cpd:C00158; cpd:C00037; cpd:C00025; cpd:C00058; cpd:C00064; hsa:39; hsa:55902
Pantothenate and CoA biosynthesis	cpd:C00864; cpd:C00183; cpd:C00049; hsa:53354; hsa:8876
Ascorbate and aldarate metabolism	hsa:10720; hsa:7365; hsa:79799
Arginine biosynthesis	cpd:C00025; cpd:C00049; cpd:C00064; hsa:4846
Nicotinate and nicotinamide metabolism	cpd:C00049; hsa:23475; hsa:4860; hsa:23410; hsa:4907
Butanoate metabolism	cpd:C00025; hsa:3157; hsa:3158; hsa:39
Pyruvate metabolism	cpd:C00186; hsa:5105; hsa:2739; hsa:55902; hsa:39
Glycolysis or Gluconeogenesis	cpd:C00186; cpd:C00221; hsa:230; hsa:80201; hsa:5105; hsa:55902
Alanine, aspartate and glutamate metabolism	cpd:C00049; cpd:C00041; cpd:C00025; cpd:C00064; cpd:C00158; hsa:80150
Arginine and proline metabolism	cpd:C00300; cpd:C00134; cpd:C00148; cpd:C00025; cpd:C02305; hsa:4846; hsa:4128
Pentose and glucuronate interconversions	hsa:57016; hsa:10720; hsa:7365; hsa:79799
Mucin type O-glycan biosynthesis	hsa:9245; hsa:6482; hsa:63917
Nitrogen metabolism	cpd:C00025; cpd:C00064
D-Glutamine and D-glutamate metabolism	cpd:C00025; cpd:C00064
Drug metabolism - other enzymes	hsa:10720; hsa:7365; hsa:79799; hsa:6241; hsa:2938; hsa:4257
Fructose and mannose metabolism	hsa:57016; hsa:80201; hsa:5210; hsa:230
Lysine degradation	cpd:C00047; hsa:23127; hsa:39; hsa:2639
Histidine metabolism	cpd:C00025; cpd:C00049; hsa:4128
Valine, leucine and isoleucine degradation	cpd:C00671; cpd:C00183; cpd:C00123; hsa:39; hsa:3157; hsa:3158
Neomycin, kanamycin and gentamicin biosynthesis	hsa:80201
Glycerolipid metabolism	hsa:80339; hsa:23175; hsa:57016
Drug metabolism - cytochrome P450	hsa:2938; hsa:4257; hsa:10720; hsa:7365; hsa:79799; hsa:4128
Metabolism of xenobiotics by cytochrome P450	hsa:1543; hsa:2938; hsa:4257; hsa:10720; hsa:7365; hsa:79799; hsa:1577; hsa:6822
Citrate cycle (TCA cycle)	cpd:C00158; hsa:47; hsa:5105
Glycine, serine and threonine metabolism	cpd:C00037; cpd:C00188; cpd:C00300; hsa:4128
Tryptophan metabolism	hsa:1543; hsa:4128; hsa:39; hsa:2639
Linoleic acid metabolism	hsa:1573
Steroid hormone biosynthesis	hsa:1586; hsa:1543; hsa:1577; hsa:51478; hsa:10720; hsa:7365; hsa:79799; hsa:6783
Pentose phosphate pathway	hsa:230; hsa:2539
Pyrimidine metabolism	cpd:C00064; hsa:6241; hsa:4907; hsa:4860
Biotin metabolism	cpd:C00047
Phenylalanine metabolism	hsa:4128
Propanoate metabolism	hsa:55902; hsa:39
alpha-Linolenic acid metabolism	hsa:9415
Galactose metabolism	hsa:57016; hsa:80201
Amino sugar and nucleotide sugar metabolism	cpd:C00043; hsa:10007; hsa:80201
Arachidonic acid metabolism	hsa:1573; hsa:8529; hsa:2878
Glycerophospholipid metabolism	cpd:C00670; hsa:23175; hsa:64850
Folate biosynthesis	hsa:5805; hsa:57016
Glycosphingolipid biosynthesis - globo and isoglobo series	hsa:6482
One carbon pool by folate	hsa:10797
Selenocompound metabolism	cpd:C00041
Fatty acid degradation	hsa:39; hsa:2639; hsa:2182
Ether lipid metabolism	cpd:C00670
Fatty acid elongation	hsa:641371; hsa:79071
N-Glycan biosynthesis	hsa:199857; hsa:1603
Starch and sucrose metabolism	hsa:80201
beta-Alanine metabolism	cpd:C00049
Glycosphingolipid biosynthesis - ganglio series	hsa:6482
Biosynthesis of unsaturated fatty acids	hsa:641371
Purine metabolism	cpd:C00064; hsa:6241; hsa:4907; hsa:4860
Cysteine and methionine metabolism	hsa:4144
Fatty acid biosynthesis	hsa:2194; hsa:2182
Tyrosine metabolism	hsa:4128
Primary bile acid biosynthesis	cpd:C00037
Glycosphingolipid biosynthesis - lacto and neolacto series	hsa:2651

## Sheet: IP-LFQ>1.5
Uniprot ID	Gene Name
Q12905	ILF2
P18621	RPL17
Q96F86	EDC3
P62829	RPL23
Q13724	MOGS
P61353	RPL27
P51659	HSD17B4
Q9H479	FN3K
P18077	RPL35A
Q99460	PSMD1
P19474	TRIM21
P04908	H2AC8
P08195	SLC3A2
Q02218	OGDH
P60866	RPS20
Q9UKH1	PRMT5
O43143	DHX15
P62273	RPS29
Q9UIW9	CDK5RAP2
Q06787	FMR1
P62249	RPS16
P50895	BCAM
Q13310	PABPC4
Q96HK7	HNRNPC
P53007	SLC25A1
P32969	RPL9
Q14498	RBM39
P29692	EEF1D
P62244	RPS15A
P05783	KRT18
Q9UDE9	LDHA
P30084	ECHS1
P38646	HSPA9
P35268	RPL22
P12268	IMPDH2
Q7KZF4	SND1
Q9NX63	CHCHD3
P32119	PRDX2
Q6P2Q9	PRPF8
Q562R1	ACTBL2
P05388	RPLP0
P13473	LAMP2
P27635	RPL10
Q8IZK6	MCOLN2
P49327	FASN
P09327	VIL1
P49207	RPL34
P05387	RPLP2
P05060	CHGB
P19013	KRT4
P14923	JUP
P55083	MFAP4
P55036	PSMD4
Q15208	STK38
O60488	ACSL4
P78371	CCT2
P83731	RPL24
P07306	ASGR1
P56134	ATP5MF
Q9Y678	COPG1
A0A087WVV2	RRBP1
Q6KB66	KRT80
P84103	SRSF3
Q9HAV7	GRPEL1
Q08380	LGALS3BP
Q5TZA2	CROCC
Q6S382	PLEC
Q9Y3U8	RPL36
Q9HD12	CCAR2
Q9NUI1	DECR2
Q9Y4L1	HYOU1
P61247	RPS3A
O75197	LRP5
O00159	MYO1C
P11177	PDHB
P40227	CCT6A
Q8TCG3	TPM3
P57796	CABP4
Q13268	DHRS2
P61604	HSPE1
Q15084	PDIA6
Q8TF65	GIPC2
P62805	H4C6
Q9UL56	CYB5R3
P09651	HNRNPA1
Q8IZQ1	WDFY3
O60814	H2BC12
P42766	RPL35
Q9UKS6	PACSIN3
P62906	RPL10A
P61313	RPL15
P26599	PTBP1
Q13243	SRSF5
P25398	RPS12
P31689	DNAJA1
P37108	SRP14
P06702	S100A9
Q15293	RCN1
Q96EE6	SOD2
P62847	RPS24
P62263	RPS14
P05141	SLC25A5
Q9H444	CHMP4B
P05386	RPLP1
P15924	DSP
P35637	FUS
P68104	EEF1A1
Q9UJA5	TRMT6
Q96FX7	TRMT61A
Q68DL7	C18orf63
P31151	S100A7
Q13283	G3BP1
P62851	RPS25
P62899	RPL31
P07814	EPRS1
Q6PK16	MYH10
P62701	RPS4X
P46778	RPL21
P62913	RPL11
P20700	LMNB1
P62269	RPS18
Q9NUQ6	SPATS2L
P46777	RPL5
O43242	PSMD3
P12956	XRCC6
Q9UH99	SUN2
Q14681	KCTD2
O75947	ATP5PD
Q969Q0	RPL36AL
P62917	RPL8
P62081	RPS7
P62277	RPS13
P13646	KRT13
Q9BYF6	RPL14
P54105	CLNS1A
Q7L5D6	GET4
Q00839	HNRNPU
P04843	RPN1
P61254	RPL26
Q5XUX0	FBXO31
P10809	HSPD1
O43795	MYO1B
P30101	PDIA3
Q9HD42	CHMP1A
P23246	SFPQ
P50502	ST13
P46783	RPS10
P62910	RPL32
Q53GQ0	HSD17B12
P40939	HADHA
Q9Y266	NUDC
Q00325	SLC25A3
Q9UP71	CTNND1
P48735	IDH2
Q5JUZ7	AIFM1
P52815	MRPL12
O43390	HNRNPR
P18085	ARF4
Q5SRP9	BAG6
Q6P2E9	EDC4
P23284	PPIB
O00571	DDX3X
A6NMK8	INSYN2B
P24752	ACAT1
P62241	RPS8
Q9BQA1	WDR77
P62736	ACTA2
O95793	STAU1
P62266	RPS23
Q9NWG4	ANKHD1
P39019	RPS19
O43707	ACTN4
P19404	NDUFV2
P05198	EIF2S1
Q8N4N8	KIF2B
P15121	AKR1B1
P62888	RPL30
P11142	HSPA8
Q9CY33	TUBB
P62750	RPL23A
Q9UJS0	SLC25A13
Q9NX58	LYAR
O75688	PPM1B
P14314	PRKCSH
Q02543	RPL18A
P30837	ALDH1B1
Q99623	PHB2
Q9BWB5	PKM
Q5T567	ALDH18A1
P46779	RPL28
Q4KMZ1	IQCC
P16989	YBX3
P30050	RPL12
P46781	RPS9
P0C0S8	H2AC13
Q9NYL9	TMOD3
Q8TEM1	NUP210
O95816	BAG2
Q9NQL1	SLK
P13667	PDIA4
P07237	P4HB
P68032	ACTC1
Q9UQ80	PA2G4
O95071	UBR5
Q9NRN2	ILF3

## Sheet: DomainEnrichment
# background genes	# genes	category	description	FDR value		genes	p-value	term name
12	7	Pfam	Metallothionein	0.0015	19.6446	MT2A|MT1A|MT1E|MT1F|MT1G|MT1M|MT1X	5.71e-07	PF00131
11	6	InterPro Domains	Metallothionein, vertebrate	0.0155	18.369	MT2A|MT1A|MT1F|MT1G|MT1M|MT1X	5.09e-06	IPR000006
11	6	InterPro Domains	Metallothionein	0.0155	18.369	MT2A|MT1A|MT1F|MT1G|MT1M|MT1X	5.09e-06	IPR003019
11	6	InterPro Domains	Metallothionein domain superfamily	0.0155	18.369	MT2A|MT1A|MT1F|MT1G|MT1M|MT1X	5.09e-06	IPR017854
9	6	InterPro Domains	Metallothionein, vertebrate, metal binding site	0.0155	22.4509	MT2A|MT1A|MT1F|MT1G|MT1M|MT1X	2.16e-06	IPR018064
11	6	InterPro Domains	Metallothionein domain superfamily, vertebrate	0.0155	18.369	MT2A|MT1A|MT1F|MT1G|MT1M|MT1X	5.09e-06	IPR023587
153	18	InterPro Domains	NAD(P)-binding domain superfamily	0.0155	3.96193	DECR2|HSD17B7|HSD17B12|FASN|DHRS4|DHRS4L2|DHRS2|RTN4IP1|NSDHL|HADHA|RDH11|G6PD|MTHFD2|DHRS1|PTGR1|HSD17B4|LDHA|ACLY	2.16e-06	IPR036291
4	4	InterPro Domains	Protein disulphide isomerase	0.0437	33.6764	PDIA2|PDIA3|P4HB|PDIA4	4.26e-05	IPR005792
10	5	InterPro Domains	Thiolase-like	0.0437	16.8382	ACAT1|FASN|HMGCS1|ACAT2|HMGCS2	4.49e-05	IPR016039
